# Supplementary material
Source: PubMed Central journal article supplement (PMC6456394)
Supplement: NIHMS1518336-supplement-1.pdf [file NIHMS1518336-supplement-1.pdf]

**Functional Connectivity of Frontoparietal and Salience/Ventral Attention Networks Have Independent Associations With Co-Occurring Attention-Deficit/Hyperactivity Disorder Symptoms in Children With Autism**

*Supplemental Information*

Table S1. Participant Characteristics for Those Children With ASD With and Without an ADHD Rating Scale, 4<sup>th</sup> Edition (ADHD-RS-IV)

|                                                | ADHD-RS-IV<br>n=57 | No ADHD-RS-IV<br>n=20 | <i>p</i> -value* | Hedges <i>g</i> |
|------------------------------------------------|--------------------|-----------------------|------------------|-----------------|
| Age – M(SD)                                    | 145.8 (28.7)       | 157.5 (37.6)          | 0.22             | 0.37            |
| GCA – M(SD)                                    | 107.8 (18.4)       | 108.3 (15.9)          | 0.92             | 0.03            |
| Sex-Ratio (M:F)                                | 47:10              | 13:7                  | 0.19             | --              |
| ADOS Social Affect                             | 8.8 (3.5)          | 8.1 (4.0)             | 0.47             | 0.19            |
| ADOS Repetitive Behaviors                      | 2.3 (1.7)          | 2.4 (1.6)             | 0.75             | 0.06            |
| ADOS Total Score                               | 11.1 (3.6)         | 10.5 (4.1)            | 0.57             | 0.16            |
| ADOS Calibrated Severity Score                 | 6.5 (2.0)          | 6.1 (2.2)             | 0.46             | 0.19            |
| CASI-IV – Anxiety (20 items)                   | 11.6 (7.5)         | 15.0 (9.7)            | 0.17             | 0.45            |
| In-Scanner Motion (Relative Mean Displacement) | 0.09 (0.04)        | 0.13 (0.05)           | <0.001           | 0.93            |
| FP-A                                           | 0.31 (0.09)        | 0.32 (0.07)           | 1.00             | 0.18            |
| FP-B                                           | 0.32 (0.08)        | 0.29 (0.06)           | 0.56             | 0.47            |
| FP-C                                           | 0.62 (0.12)        | 0.62 (0.10)           | 1.00             | 0.00            |
| FP-A-FP-B                                      | 0.12 (0.10)        | 0.10 (0.05)           | 0.86             | 0.35            |
| FP-A-FP-C                                      | -0.05 (0.09)       | -0.06 (0.07)          | 1.00             | 0.14            |
| FP-B-FP-C                                      | -0.11 (0.15)       | -0.06 (0.13)          | 1.00             | 0.37            |
| SAL-VA-A                                       | 0.05 (0.12)        | 0.02 (0.17)           | 0.86             | 0.25            |
| SAL-VA-B                                       | 0.20 (0.11)        | 0.16 (0.15)           | 1.00             | 0.21            |
| SAL-VA-A~SAL-VA-B                              | -0.05 (0.10)       | -0.02 (0.09)          | 0.86             | 0.26            |
| FP-A-SAL-VA-A                                  | 0.22 (0.12)        | 0.21 (0.12)           | 1.00             | 0.07            |
| FP-A-SAL-VA-B                                  | 0.22 (0.09)        | 0.23 (0.07)           | 1.00             | 0.02            |
| FP-B-SAL-VA-A                                  | -0.09 (0.11)       | -0.08 (0.11)          | 1.00             | 0.10            |
| FP-B-SAL-VA-B                                  | 0.09 (0.09)        | 0.08 (0.06)           | 1.00             | 0.12            |
| FP-C-SAL-VA-A                                  | -0.12 (0.10)       | -0.09 (0.10)          | 0.86             | 0.25            |
| FP-C-SAL-VA-B                                  | -0.02 (0.09)       | 0.02 (0.06)           | 0.44             | 0.58            |

FP-A=frontoparietal-A, FP-B=frontoparietal-B, FP-C=frontoparietal-C, SAL-VA-A=saliency-ventral attention-A, SAL-VA-B=saliency-ventral attention-B. For these rows, values in the ADHD-RS-IV and No ADHD-RS-IV columns represent z-transformed average correlations within each corresponding network.

\**p*-values reported for functional connectivity analyses are FDR-adjusted

Table S2. List of Parcels From Schaefer *et al.*, (2017) That Were Included in the Three Frontoparietal Subsystems and Two Salience-Ventral Attention Subsystems

| Subsystem                                 | Hemisphere | Parcel Label                | Parcel Number |                        |     |
|-------------------------------------------|------------|-----------------------------|---------------|------------------------|-----|
| FP-A                                      | Right      | Intraparietal Sulcus-1      | 165           |                        |     |
|                                           |            | Intraparietal Sulcus-2      | 166           |                        |     |
|                                           |            | Dorsal Prefrontal Cortex-1  | 167           |                        |     |
|                                           |            | Lateral Prefrontal Cortex-1 | 168           |                        |     |
|                                           |            | Lateral Prefrontal Cortex-2 | 169           |                        |     |
|                                           |            | Anterior Cingulate-1        | 170           |                        |     |
|                                           |            | Temporal-1                  | 57            |                        |     |
|                                           | Left       | Intraparietal Sulcus-1      | 58            |                        |     |
|                                           |            | Intraparietal Sulcus-2      | 59            |                        |     |
|                                           |            | Intraparietal Sulcus-3      | 60            |                        |     |
|                                           |            | Dorsal Prefrontal Cortex-1  | 61            |                        |     |
|                                           |            | Lateral Prefrontal Cortex-1 | 62            |                        |     |
|                                           |            | Lateral Prefrontal Cortex-2 | 63            |                        |     |
|                                           |            | Lateral Prefrontal Cortex-3 | 64            |                        |     |
|                                           |            | Lateral Prefrontal Cortex-4 | 65            |                        |     |
|                                           |            | Anterior Cingulate-1        | 66            |                        |     |
|                                           |            | FP-B                        | Right         | Temporal-1             | 171 |
|                                           |            |                             |               | Temporal-2             | 172 |
|                                           |            |                             |               | Intraparietal Lobule-1 | 173 |
| Intraparietal Lobule-2                    | 174        |                             |               |                        |     |
| Lateral Dorsal Prefrontal Cortex-1        | 175        |                             |               |                        |     |
| Lateral Dorsal Prefrontal Cortex-2        | 176        |                             |               |                        |     |
| Lateral Ventral Prefrontal Cortex-1       | 177        |                             |               |                        |     |
| Lateral Ventral Prefrontal Cortex-2       | 178        |                             |               |                        |     |
| Medial Para-cingulate Prefrontal Cortex-1 | 179        |                             |               |                        |     |

| Subsystem | Hemisphere | Parcel Label                              | Parcel Number |
|-----------|------------|-------------------------------------------|---------------|
|           |            | Medial Para-cingulate Prefrontal Cortex-2 | 180           |
|           | Left       | Temporal-1                                | 67            |
|           |            | Intraparietal Lobule-1                    | 68            |
|           |            | Lateral Prefrontal Cortex-1               | 69            |
|           |            | Lateral Ventral Prefrontal Cortex-1       | 70            |
|           |            | Lateral Ventral Prefrontal Cortex-2       | 71            |
| FP-C      | Right      | Pre-Cuneous-1                             | 181           |
|           |            | Pre-Cuneous-2                             | 182           |
|           |            | Posterior Cingulate-1                     | 183           |
|           | Left       | Pre-Cuneous-1                             | 72            |
|           |            | Pre-Cuneous-2                             | 73            |
|           |            | Posterior Cingulate-1                     | 74            |
| SAL-VA-A  | Right      | Pars Opercularis-1                        | 142           |
|           |            | Pre-Central Gyrus-1                       | 143           |
|           |            | Insula-1                                  | 144           |
|           |            | Insula-2                                  | 145           |
|           |            | Insula-3                                  | 146           |
|           |            | Medial Frontal-1                          | 147           |
|           |            | Medial Frontal-2                          | 148           |
|           |            | Medial Frontal -3                         | 149           |
|           |            | Medial Frontal-4                          | 150           |
|           | Left       | Pars Opercularis-1                        | 40            |
|           |            | Insula-1                                  | 41            |
|           |            | Insula-2                                  | 42            |

| Subsystem | Hemisphere | Parcel Label                              | Parcel Number |
|-----------|------------|-------------------------------------------|---------------|
|           |            | Insula-3                                  | 43            |
|           |            | Medial Parietal-1                         | 44            |
|           |            | Medial Frontal-1                          | 45            |
|           |            | Medial Frontal-2                          | 46            |
| SAL-VA-B  | Right      | Intraparietal Lobule-1                    | 151           |
|           |            | Lateral Prefrontal Cortex-1               | 152           |
|           |            | Lateral Prefrontal Cortex-2               | 153           |
|           |            | Ventral Prefrontal Cortex-1               | 154           |
|           |            | Ventral Prefrontal Cortex-2               | 155           |
|           |            | Medial Para-cingulate Prefrontal Cortex-1 | 156           |
|           | Left       | Intraparietal Lobule-1                    | 47            |
|           |            | Lateral Prefrontal Cortex-1               | 48            |
|           |            | Ventral Prefrontal Cortex-1               | 49            |
|           |            | Medial Para-cingulate Prefrontal Cortex-1 | 50            |

Table S3. Group Differences Using Bayesian Approach

| Systems           |       | ASD<br>n=77          | TDC<br>n=82          | BEST Mean<br>Difference<br>[95% CI] | <i>p</i> -value  |
|-------------------|-------|----------------------|----------------------|-------------------------------------|------------------|
| FP-A              | Mean: | 0.31 [0.29, 0.33]    | 0.34 [0.32, 0.36]    | 0.03 [-0.00, 0.06]                  | <i>p</i> = 0.027 |
|                   | SD:   | 0.09 [0.07, 0.10]    | 0.09 [0.07, 0.10]    |                                     |                  |
| FP-B              | Mean: | 0.31 [0.29, 0.33]    | 0.33 [0.32, 0.35]    | 0.02 [-0.01, 0.046]                 | <i>p</i> = 0.065 |
|                   | SD:   | 0.08 [0.07, 0.09]    | 0.08 [0.07, 0.10]    |                                     |                  |
| FP-C              | Mean: | 0.62 [0.59, 0.64]    | 0.68 [0.65, 0.71]    | 0.06 [0.02, 0.10]                   | <i>p</i> < 0.001 |
|                   | SD:   | 0.11 [0.09, 0.13]    | 0.13 [0.10, 0.15]    |                                     |                  |
| FP-A~FP-B         | Mean: | 0.11 [0.09, 0.13]    | 0.12 [0.10, 0.14]    | 0.01 [-0.02, 0.04]                  | <i>p</i> = 0.349 |
|                   | SD:   | 0.08 [0.07, 0.10]    | 0.08 [0.07, 0.11]    |                                     |                  |
| FP-A~FP-C         | Mean: | -0.06 [-0.08, -0.04] | -0.01 [-0.04, -0.16] | 0.04 [0.01, 0.08]                   | <i>p</i> = 0.006 |
|                   | SD:   | 0.08 [0.06, 0.09]    | 0.12 [0.10, 0.15]    |                                     |                  |
| FP-B~FP-C         | Mean: | -0.10 [-0.13, -0.06] | -0.08 [-0.11, -0.05] | 0.02 [-0.03, 0.07]                  | <i>p</i> = 0.201 |
|                   | SD:   | 0.14 [0.11, 0.17]    | 0.14 [0.11, 0.17]    |                                     |                  |
| SAL-VA-A          | Mean: | 0.42 [0.40, 0.44]    | 0.47 [0.45, 0.50]    | 0.06 [0.03, 0.09]                   | <i>p</i> < 0.001 |
|                   | SD:   | 0.09 [0.08, 0.11]    | 0.11 [0.09, 0.13]    |                                     |                  |
| SAL-VA-B          | Mean: | 0.41 [0.39, 0.44]    | 0.48 [0.46, 0.51]    | 0.07 [0.04, 0.10]                   | <i>p</i> < 0.001 |
|                   | SD:   | 0.10 [0.09, 0.12]    | 0.11 [0.10, 0.13]    |                                     |                  |
| SAL-VA-A~SAL-VA-B | Mean: | -0.04 [-0.06, -0.02] | -0.02 [-0.04, 0.01]  | 0.02 [-0.11, 0.06]                  | <i>p</i> = 0.086 |
|                   | SD:   | 0.09 [0.08, 0.11]    | 0.11 [0.09, 0.14]    |                                     |                  |
| FP-A~SAL-VA-A     | Mean: | 0.22 [0.19, 0.24]    | 0.25 [0.23, 0.28]    | 0.04 [0.00, 0.08]                   | <i>p</i> = 0.024 |
|                   | SD:   | 0.12 [0.10, 0.14]    | 0.12 [0.10, 0.14]    |                                     |                  |

| Systems       |       | ASD<br>n=77          | TDC<br>n=82          | BEST Mean<br>Difference<br>[95% CI] | <i>p</i> -value  |
|---------------|-------|----------------------|----------------------|-------------------------------------|------------------|
| FP-A~SAL-VA-B | Mean: | 0.21 [0.00, 0.04]    | 0.06 [0.04, 0.08]    | 0.04 [0.01, 0.07]                   | <i>p</i> = 0.009 |
|               | SD:   | 0.09 [0.07, 0.10]    | 0.10 [0.08, 0.12]    |                                     |                  |
| FP-B~SAL-VA-A | Mean: | -0.08 [-0.11, -0.06] | -0.08 [-0.10, -0.06] | 0.00 [-0.03, 0.04]                  | <i>p</i> = 0.428 |
|               | SD:   | 0.11 [0.09, 0.13]    | 0.10 [0.08, 0.12]    |                                     |                  |
| FP-B~SAL-VA-B | Mean: | 0.09 [0.07, 0.11]    | 0.12 [0.10, 0.14]    | 0.03 [0.00, 0.06]                   | <i>p</i> = 0.014 |
|               | SD:   | 0.08 [0.07, 0.10]    | 0.09 [0.07, 0.10]    |                                     |                  |
| FP-C~SAL-VA-A | Mean: | -0.11 [-0.14, -0.09] | -0.10 [-0.12, -0.07] | 0.01 [-0.23, 0.05]                  | <i>p</i> = 0.233 |
|               | SD:   | 0.10 [0.09, 0.12]    | 0.12 [0.10, 0.14]    |                                     |                  |
| FP-C~SAL-VA-B | Mean: | -0.1 [-0.03, 0.01]   | 0.01 [-0.01, 0.03]   | 0.02 [-0.01, 0.05]                  | <i>p</i> = 0.068 |
|               | SD:   | 0.08 [0.06, 0.10]    | 0.09 [0.07, 0.11]    |                                     |                  |

FP-A=frontoparietal sub-system A

FP-B=frontoparietal sub-system B

FP-C=frontoparietal sub-system C

SAL-VA-A=saliency-ventral attention A

SAL-VA-B=saliency-ventral attention B

For these rows, values in the ASD and TDC columns represent z-transformed average correlations within each corresponding network.

Table S4. Group Differences Using Analysis of Covariance

| Systems           | Confounds included in final model                   | FDR-corrected<br><i>p</i> -value for<br>Group | Group $h_p^2$ |
|-------------------|-----------------------------------------------------|-----------------------------------------------|---------------|
| FP-A              | Age (linear, quadratic), Relative Mean Displacement | 0.111                                         | 0.02          |
| FP-B              | Relative Mean Displacement                          | 0.232                                         | 0.01          |
| FP-C              | None                                                | <b>&lt;0.005</b>                              | <b>0.07</b>   |
| FP-A~FP-B         | None                                                | 0.807                                         | 0.00          |
| FP-A~FP-C         | IQ, Relative Mean Displacement                      | 0.063                                         | 0.04          |
| FP-B~FP-C         | IQ, Relative Mean Displacement                      | 0.684                                         | 0.00          |
| SAL-VA-A          | Age (cubic), Scan Sequence                          | <b>&lt;0.005</b>                              | <b>0.07</b>   |
| SAL-VA-B          | Gender, Scan Sequence                               | <b>&lt;0.005</b>                              | <b>0.09</b>   |
| SAL-VA-A~SAL-VA-B | Age (linear), Relative Mean Displacement            | 0.257                                         | 0.01          |
| FP-A~SAL-VA-A     | None                                                | 0.101                                         | 0.03          |
| FP-A~SAL-VA-B     | Relative Mean Displacement, Scan Sequence           | 0.101                                         | 0.03          |
| FP-B~SAL-VA-A     | Relative Mean Displacement                          | 0.896                                         | 0.00          |
| FP-B~SAL-VA-B     | Relative Mean Displacement                          | 0.101                                         | 0.03          |
| FP-C~SAL-VA-A     | Relative Mean Displacement                          | 0.645                                         | 0.00          |
| FP-C~SAL-VA-B     | Relative Mean Displacement                          | 0.188                                         | 0.02          |

FP-A=frontoparietal sub-system A

FP-B=frontoparietal sub-system B

FP-C=frontoparietal sub-system C

SAL-VA-A=salience-ventral attention A

SAL-VA-B=salience-ventral attention B



Table S5. Non-significant Group Differences Using t-Tests

|                   | ASD<br>M(SD) | TDC<br>M(SD) | FDR corrected-<br><i>p-value</i> | Hedges <i>g</i> |
|-------------------|--------------|--------------|----------------------------------|-----------------|
| FP-A              | 0.31         | 0.33         | 0.082                            | 0.32            |
| FP-B              | 0.31         | 0.33         | 0.171                            | 0.24            |
| FP-A~FP-B         | 0.12         | 0.12         | 0.753                            | 0.05            |
| FP-B~FP-C         | -0.10        | -0.08        | 0.428                            | 0.15            |
| SAL-VA-A~SAL-VA-B | -0.04        | -0.02        | 0.171                            | 0.24            |
| FP-A~SAL-VA-A     | 0.22         | 0.26         | 0.082                            | 0.32            |
| FP-B~SAL-VA-A     | -0.08        | -0.08        | 0.753                            | 0.05            |
| FP-B~SAL-VA-B     | 0.09         | 0.12         | 0.062                            | 0.36            |
| FP-C~SAL-VA-A     | -0.11        | -0.10        | 0.451                            | 0.14            |
| FP-C~SAL-VA-B     | -0.01        | 0.01         | 0.113                            | 0.29            |

FP-A=frontoparietal sub-system A

FP-B=frontoparietal sub-system B

FP-C=frontoparietal sub-system C

SAL-VA-A=salience-ventral attention A

SAL-VA-B=salience-ventral attention B

For these rows, values in the ASD and TDC columns represent z-transformed average correlations within each corresponding network.

Table S6. Correlation Matrix of Partial Correlations of ADHD Rating Scale Caregiver Version with Frontoparietal and Salience-Ventral Attention Subsystems and Bayesian Correlations

|                         | ASD Symptoms Covaried | Residual Motion Covaried | Bayesian Correlation  |
|-------------------------|-----------------------|--------------------------|-----------------------|
| ADHD Symptoms~Sal-VA-B  | -0.30*                | -0.27*                   | -0.28* [-0.51 -0.027] |
| ADHD Symptoms~FP-A-FP-C | -0.27*                | -0.25^                   | -0.26* [-0.50 -0.004] |

ADHD Symptoms=ADHD Rating Scale, 4<sup>th</sup> Edition (total raw score is used)

FP-A-FP-C= Functional connectivity between frontoparietal subsystem A and frontoparietal subsystem C (Fisher's z)

Sal-VA-B=Functional connectivity within salience-ventral attention subsystem B (Fisher's z)

\* $p < .05$ ; ^ $p < 0.10$

*Note.* Values in the brackets are the 95% credibility intervals for the correlation.
